# Supplementary material for: Changes in Physicochemical Characteristics and Volatile Flavor Compounds of Brine-Preserved Ready-to-Eat Shrimp (Solenocera crassicornis) during Chilled Storage
Source: MDPI journal article supplement (doi:10.3390/fishes8070372), 2023-07-19
Supplement: s1 [file s1]

Supplementary Material

# Changes in Physicochemical Characteristics and Volatile Flavor Compounds of Brine-Preserved Ready-to-Eat Shrimp (*Solenocera crassicornis*) during Chilled Storage

**Table S1.** Criteria for sensory evaluation.

| Project.              | Standard description                                                                     | Score |
|-----------------------|------------------------------------------------------------------------------------------|-------|
| Color                 | Red or white in color, bright, and shiny                                                 | 8–10  |
|                       | Light red in color, less bright and shiny                                                | 5–7   |
|                       | Extremely pale or discolored, extremely poor brightness                                  | 1–4   |
| Texture               | Extremely elasticity and perfectly textured                                              | 8–10  |
|                       | Less elasticity, brittle, and less damaged                                               | 5–7   |
|                       | Soft and easily falls apart                                                              | 1–4   |
| Odor                  | Characteristic flavor of shrimp and no peculiar smell                                    | 8–10  |
|                       | Characteristics of slightly worse flavor of shrimp, slightly fishy smell, and other odor | 5–7   |
|                       | Strong and noticeable unpleasant odor                                                    | 1–4   |
| Taste                 | Tender, soft and hard, and chewy                                                         | 8–10  |
|                       | More tender, soft, and not chewy enough                                                  | 5–7   |
|                       | Rough, too soft, and not chewy                                                           | 1–4   |
| Overall acceptability | Easy to accept                                                                           | 8–10  |
|                       | Can be accept                                                                            | 5–7   |
|                       | Unacceptable                                                                             | 1–4   |

**Table S2.** The volatile components and its relative content in the ready-to-eat shrimp during chilled storage.

| No       | Compound              |         | Volume (a.u.) |         |          |         |          |          |         |         |         |
|----------|-----------------------|---------|---------------|---------|----------|---------|----------|----------|---------|---------|---------|
|          |                       |         | CK            |         |          | E1      |          |          | E2      |         |         |
|          |                       |         | 0             | 20      | 40       | 0       | 20       | 40       | 0       | 20      | 40      |
| Alcohols |                       |         |               |         |          |         |          |          |         |         |         |
| 1        | Linalool              | C78706  | 199.4±        | 211.4±  | 437.9±   | 190.2±  | 191.1±   | 305.0±   | 181.6±  | 146.5±  | 192.4±  |
|          |                       |         | 88.0c         | 22.7c   | 56.7a    | 12.3c   | 3.6c     | 35.5b    | 27.7c   | 61.9c   | 15.3c   |
| 2        | (E)-3-Hexen-1-ol      | C928972 | 63.1±         | 87.5±   | 139.5±   | 81.8±   | 104.3±   | 82.4±    | 81.3±   | 64.5±   | 71.9±   |
|          |                       |         | 23.1b         | 18.6b   | 20.3a    | 9.2b    | 24.7ab   | 22.6b    | 6.0b    | 34.2b   | 7.3b    |
| 3        | 1-Butanol-M           | C71363  | 617.1±        | 472.8±  | 2605.8±  | 476.6±  | 275.6±   | 1168.0±  | 568.0±  | 1334.3± | 809.5±  |
|          |                       |         | 57.6e         | 5.1f    | 87.8a    | 30.5f   | 36.1g    | 165.3c   | 18.5ef  | 32.6b   | 11.6d   |
| 4        | 1-Butanol-D           | C71363  | 58.3±         | 66.0±   | 2399.0±  | 60.0±   | 49.0±    | 632.0±   | 65.8±   | 215.1±  | 101.6±  |
|          |                       |         | 7.5d          | 8.9d    | 14.6a    | 7.7d    | 7.7d     | 98.0b    | 5.2d    | 23.7c   | 13.9d   |
| 5        | 2-Methyl-1-propanol-M | C78831  | 248.4±        | 229.0±  | 2371.1±  | 239.3±  | 1233.6±  | 2417.6±  | 268.8±  | 370.5±  | 298.3±  |
|          |                       |         | 22.1de        | 9.0e    | 63.7a    | 12.2e   | 28.0b    | 34.1a    | 10.2de  | 5.1c    | 9.1d    |
| 6        | 2-Methyl-1-propanol-D | C78831  | 70.0±         | 92.0±   | 3410.8±  | 82.6±   | 238.0±   | 4769.9±  | 78.8±   | 78.6±   | 108.4±  |
|          |                       |         | 23.2c         | 10.1c   | 101.3b   | 4.5c    | 3.2c     | 455.3a   | 15.4c   | 21.2c   | 9.8c    |
| 7        | 1-Propanol-M          | C71238  | 1142.5±       | 575.8±  | 2188.5±  | 982.5±  | 3077.8±  | 2558.3±  | 639.8±  | 1289.3± | 791.0±  |
|          |                       |         | 71.5d         | 55.8f   | 34.0c    | 31.8de  | 419.2a   | 261.4b   | 41.3ef  | 97.2d   | 20.5ef  |
| 8        | 1-Propanol-D          | C71238  | 162.1±        | 116.6±  | 7042.7±  | 169.9±  | 1601.0±  | 8628.2±  | 192.5±  | 377.2±  | 241.3±  |
|          |                       |         | 44.0d         | 13.2d   | 271.0b   | 28.2d   | 589.2c   | 710.6a   | 10.8d   | 58.2d   | 15.9d   |
| 9        | 2-Butanol-M           | C78922  | 506.4±        | 467.2±  | 2518.6±  | 537.4±  | 583.2±   | 2361.3±  | 388.2±  | 416.0±  | 315.5±  |
|          |                       |         | 19.6de        | 11.6ef  | 34.9a    | 23.6cd  | 25.1c    | 47.3b    | 34.6g   | 32.6fg  | 13.4h   |
| 10       | 2-Butanol-D           | C78922  | 64.0±         | 69.1±   | 1643.6±  | 65.3±   | 82.5±    | 2563.0±  | 67.9±   | 63.3±   | 59.0±   |
|          |                       |         | 14.8c         | 4.9c    | 29.5b    | 7.9c    | 4.0c     | 164.4a   | 3.8c    | 15.6c   | 7.3c    |
| 11       | Ethanol               | C64175  | 4916.9±       | 1608.0± | 10105.3± | 4377.0± | 12568.0± | 10714.2± | 5213.7± | 5781.3± | 4916.9± |
|          |                       |         | 142.6f        | 319.3h  | 52.7c    | 165.2g  | 146.0a   | 102.0b   | 127.4ef | 396.7d  | 142.6de |
| 12       | 1-Penten-3-ol         | C616251 | 595.8±        | 504.7±  | 1065.0±  | 747.4±  | 581.5±   | 881.9±   | 394.4±  | 749.9±  | 640.6±  |
|          |                       |         | 40.0de        | 6.7ef   | 124.1a   | 34.0c   | 18.7de   | 116.1b   | 31.9f   | 11.7c   | 16.7cd  |
| 13       | 3-Methyl-1-butanol    | C123513 | 74.6±         | 53.7±   | 81.6±    | 92.6±   | 876.3±   | 32.0±    | 89.4±   | 105.5±  | 82.2±   |
|          |                       |         | 8.4bcd        | 1.4cd   | 7.0bc    | 8.1bc   | 62.1a    | 7.0d     | 6.4bc   | 6.9b    | 5.2bc   |
| 14       | 1-Pentanol            | C71410  | 90.4±         | 82.3±   | 85.7±    | 105.3±  | 77.2±    | 109.9±   | 129.2±  | 297.3±  | 174.2±  |
|          |                       |         | 10.0c         | 7.2c    | 5.6c     | 12.3c   | 9.4c     | 7.8c     | 26.3bc  | 70.1a   | 19.8b   |

| Aldehydes |                       |          |                    |                   |                   |                  |                   |                   |                  |                   |                   |
|-----------|-----------------------|----------|--------------------|-------------------|-------------------|------------------|-------------------|-------------------|------------------|-------------------|-------------------|
| 15        | Nonanal               | C124196  | 181.7±<br>39.0abcd | 202.8±<br>31.9abc | 147.7±<br>45.7cd  | 215.7±<br>23.0ab | 175.4±<br>33.6bcd | 153.7±<br>44.8bcd | 130.4±<br>5.4d   | 209.7±<br>39.1abc | 247.0±<br>16.9a   |
| 16        | Heptanal              | C111717  | 152.9±<br>40.5ef   | 183.0±<br>14.3def | 1017.6±<br>13.9b  | 159.5±<br>18.5ef | 246.4±<br>12.3d   | 1362.2±<br>13.0a  | 115.6±<br>11.9f  | 213.8±<br>83.9de  | 423.1±<br>27.9c   |
| 17        | 2-Methyl-2-pentenal-M | C623369  | 140.2±<br>32.5d    | 143.2±<br>8.1d    | 2829.8±<br>18.5a  | 142.3±<br>2.2d   | 772.5±<br>296.1c  | 1341.0±<br>88.0b  | 89.3±<br>7.5d    | 116.0±<br>19.4d   | 110.8±<br>11.4d   |
| 18        | 2-Methyl-2-pentenal-D | C623369  | 55.7±<br>25.7c     | 68.5±<br>6.9c     | 4128.3±<br>395.6a | 68.8±<br>7.0c    | 151.9±<br>59.9c   | 551.9±<br>80.9b   | 61.1±<br>5.8c    | 50.7±<br>25.9c    | 58.4±<br>6.8c     |
| 19        | Hexanal-M             | C66251   | 177.1±<br>20.3c    | 182.7±<br>2.5c    | 1531.1±<br>261.3a | 213.0±<br>18.9c  | 264.8±<br>21.1c   | 1095.4±<br>73.6b  | 285.8±<br>42.1c  | 792.6±<br>393.2b  | 1812.3±<br>135.2a |
| 20        | Hexanal-D             | C66251   | 33.0±<br>15.5c     | 36.0±<br>2.2c     | 176.3±<br>91.8b   | 39.3±<br>7.9c    | 36.1±<br>6.6c     | 75.9±<br>27.8c    | 40.5±<br>6.5c    | 103.9±<br>55.8bc  | 424.2±<br>72.1a   |
| 21        | 3-Methylbutanal       | C590863  | 62.2±<br>20.6d     | 688.1±<br>184.4bc | 841.8±<br>35.9bc  | 470.7±<br>417.5c | 1746.9±<br>63.9a  | 557.3±<br>13.5bc  | 35.1±<br>4.6d    | 510.5±<br>339.9c  | 933.5±<br>145.7b  |
| 22        | (E)-2-Hexenal         | C6728263 | 22.6±<br>9.6c      | 32.4±<br>14.7c    | 121.3±<br>35.8b   | 28.1±<br>2.0c    | 48.5±<br>4.5c     | 156.0±<br>16.9a   | 27.4±<br>0.3c    | 24.0±<br>7.2c     | 26.3±<br>1.4c     |
| 23        | Octanal               | C124130  | 108.4±<br>49.8bcd  | 127.5±<br>1.0bc   | 73.3±<br>17.8d    | 100.5±<br>8.3bcd | 186.4±<br>17.5a   | 90.3±<br>21.8cd   | 79.7±<br>7.3cd   | 146.8±<br>44.7ab  | 178.2±<br>5.8a    |
| 24        | Benzaldehyde          | C100527  | 136.4±<br>44.0ab   | 162.8±<br>23.4ab  | 122.16±<br>39.6b  | 148.8±<br>10.5ab | 159.6±<br>12.2ab  | 109.2±<br>37.7b   | 165.0±<br>27.1ab | 110.8±<br>38.9b   | 190.6±<br>9.6a    |
| 25        | Methional             | C100527  | 172.1±<br>25.8b    | 193.7±<br>10.6ab  | 116.2±<br>26.8c   | 211.2±<br>11.9ab | 171.4±<br>7.8b    | 110.7±<br>19.7c0  | 201.8±<br>17.8ab | 209.8±<br>46.3ab  | 231.8±<br>13.5a   |
| 26        | Pentanal              | C110623  | 29.4±<br>14.1c     | 53.0±<br>3.4c     | 138±<br>8.32c     | 87.3±<br>17.7c   | 59.9±<br>5.07c    | 482.1±<br>28.5c   | 45.3±<br>8.2c    | 959.4±<br>61.3b   | 2098.3±<br>163.1a |
| 27        | Propanal              | C123386  | 419.7±<br>17.2cd   | 334.0±<br>2.6de   | 138.0±<br>4.5e    | 492.0±<br>12.4cd | 458.5±<br>12.5cd  | 282.9±<br>19.7de  | 647.2±<br>83.4c  | 1507.5±<br>358.1b | 1970.3±<br>13.3a  |
| 28        | Diethyl acetal        | C105577  | 977.9±<br>56.1b    | 619.1±<br>92.8c   | 238.5±<br>3.7d    | 528.0±<br>30.4c  | 573.8±<br>31.9c   | 158.1±<br>28.8d   | 1058.6±<br>44.1b | 1609.2±<br>291.2a | 1060.7±<br>187.3b |
| Ketones   |                       |          |                    |                   |                   |                  |                   |                   |                  |                   |                   |
| 29        | 1-Hydroxy-2-propanone | C116096  | 50.7±<br>14.2c     | 64.1±<br>2.8c     | 597.0±<br>95.4a   | 57.2±<br>7.0c    | 78.6±<br>11.3c    | 196.4±<br>11.2b   | 54.8<br>±9.0c    | 55.9±<br>30.7c    | 72.4±<br>13.2c    |
| 30        | 2-Heptanone-M         | C110430  | 46.3±<br>7.6d      | 204.3±<br>67.5cd  | 274.9±<br>60.4bc  | 51.2±<br>2.5d    | 437.3±<br>29.7b   | 779.7±<br>2.2a    | 40.9±<br>1.4d    | 68.4±<br>7.9d     | 72.4±<br>9.2d     |

|        |                           |         |                    |                   |                   |                    |                   |                    |                    |                   |                   |
|--------|---------------------------|---------|--------------------|-------------------|-------------------|--------------------|-------------------|--------------------|--------------------|-------------------|-------------------|
| 31     | 2-Heptanone-D             | C110430 | 33.4±<br>16.6b     | 40.9±<br>4.5b     | 74.6±<br>9.8b     | 28.4±<br>1.9b      | 66.0±<br>11.9b    | 274.1±<br>7.7a     | 35.3±<br>6.2b      | 29.3±<br>15.6b    | 41.4±<br>2.9b     |
| 32     | 4-Methyl-3-penten-2-one-M | C141797 | 259.1±<br>27.6c    | 217.3±<br>12.4c   | 2198.7±<br>101.6a | 184.9±<br>10.1c    | 950.8±<br>346.8b  | 912.0±<br>99.4b    | 81.8±<br>8.0c      | 78.2±<br>18.6c    | 87.3±<br>14.2c    |
| 33     | 4-Methyl-3-penten-2-one-D | C141797 | 48.3±<br>27.8b     | 47.8±<br>1.6b     | 2310.8±<br>510.3a | 52.5±<br>4.1b      | 157.0±<br>9.0b    | 317.3±<br>73.8b    | 50.8±<br>4.6b      | 38.3±<br>15.1b    | 62.7±<br>7.7b     |
| 34     | 2-Hexanone                | C591786 | 54.8±<br>5.1f      | 142.3±<br>39.8d   | 308.3±<br>15.8c   | 58.7±<br>1.3f      | 496.4±<br>25.9a   | 379.3±<br>14.2b    | 41.4±<br>2.5f      | 64.9±<br>13.3f    | 103.6±<br>14.1e   |
| 35     | 4-Methyl-2-pentanone-M    | C108101 | 62.6±<br>6.5f      | 82.7±<br>15.5ef   | 879.5±<br>57.8a   | 72.3±<br>7.7f      | 232.5±<br>36.5c   | 687.5±<br>40.5b    | 65.0±<br>5.7f      | 131.8±<br>18.5de  | 144.1±<br>10.3d   |
| 36     | 4-Methyl-2-pentanone-D    | C108101 | 37.3±<br>8.5c      | 44.8±<br>2.3c     | 656.8±<br>108.1a  | 46.4±<br>6.6c      | 54.2±<br>8.4c     | 367.2±<br>12.3b    | 45.8±<br>4.7c      | 40.8±<br>9.8c     | 47.2±<br>6.2c     |
| 37     | 2-Pentanone               | C107879 | 66.8±<br>13.2f     | 166.2±<br>73.4ef  | 3789.5±<br>451.0a | 124.6±<br>7.7f     | 1139.7±<br>287.0c | 1761.1±<br>115.9b  | 73.3±<br>7.0f      | 551.8±<br>202.4de | 731.7±<br>38.08d  |
| 38     | 2-Butanone                | C78933  | 1403.2±<br>225.8g  | 2388<br>±494.3f   | 8480.4±<br>219.8b | 1678.5±<br>91.7g   | 4777.0±<br>380.6c | 12031.4±<br>511.5a | 2479.2±<br>56.1f   | 3418.6±<br>418.1d | 4911.1±<br>137.9c |
| 39     | Acetone                   | C67641  | 7352.4±<br>190.7de | 7496.8±<br>60.2de | 3827.5±<br>40.8f  | 7674.0±<br>137.2cd | 8096.2±<br>50.8c  | 7066.6±<br>269.3e  | 7513.1±<br>229.3de | 9324.0±<br>553.7b | 10580.4±<br>46.8a |
| 40     | 3-Nonanone                | C925780 | 81.7±<br>37.5b     | 116.3±<br>36.4ab  | 99.2±<br>44.4ab   | 101.2±<br>17.6ab   | 97.4±<br>9.3ab    | 162.5±<br>26.3a    | 91.7±<br>6.7b      | 98.8±<br>49.1ab   | 99.9±<br>5.3ab    |
| Esters |                           |         |                    |                   |                   |                    |                   |                    |                    |                   |                   |
| 41     | Pentyl acetate            | C628637 | 40.6±<br>17.6c     | 39.9±<br>5.4c     | 77.7±<br>20.5b    | 33.9±<br>5.9c      | 43.9±<br>12.2c    | 136.6±<br>6.8a     | 40.7±<br>1.8c      | 32.6±<br>15.4c    | 39.3±<br>5.2c     |
| 42     | Butyl propionate-M        | C590012 | 98.6±<br>7.2d      | 70.5±<br>9.7e     | 399.5±<br>12.2b   | 138.0±<br>27.4c    | 100.9±<br>7.8d    | 666.7±<br>5.1a     | 18.3±<br>2.8f      | 19.2±<br>7.9f     | 20.3±<br>1.2f     |
| 43     | Butyl propionate-D        | C590012 | 33.9±<br>15.0c     | 39.5±<br>4.2c     | 358.9±<br>9.6b    | 42.9±<br>5.6c      | 46.9±<br>8.9c     | 513.3±<br>6.5a     | 36.1±<br>1.4c      | 36.2±<br>20.1c    | 38±<br>5.2c       |
| 44     | Ethyl butanoate           | C105544 | 30.7±<br>10.9b     | 32.7±<br>3.5b     | 175.8±<br>26.2a   | 32.5±<br>4.5b      | 33.3±<br>3.4b     | 42.4±<br>10.5b     | 34.2±<br>4.7b      | 28.5±<br>11.3b    | 39.1±<br>9.3b     |
| 45     | Ethyl Acetate             | C141786 | 286.8±<br>49.9ef   | 243.2±<br>3.2f    | 2279.5±<br>126.4b | 261.3±<br>13.9ef   | 655.8±<br>6.5c    | 5254.5±<br>99.3a   | 401.5±<br>61.1de   | 624.9±<br>77.5c   | 520.9±<br>89.7cd  |
| 46     | Propyl acetate            | C109604 | 46.7±<br>5.1b      | 59.4±<br>9.8b     | 58.1±<br>10.7b    | 51.1±<br>3.7b      | 47.0±<br>4.5b     | 1015.2±<br>147.6a  | 71.1±<br>2.5b      | 63.6±<br>7.4b     | 70.2±<br>6.6b     |
| 47     | Ethyl isobutyrate         | C97621  | 19.8±              | 22.8±             | 287.7±            | 30.8±              | 36.2±             | 666.3±             | 34.2±              | 32.5±             | 29.8±             |

|    |                      |          | 7.7c                | 2.5c                 | 40.2b                | 4.9c                | 1.8c                | 25.5a               | 1.3c                | 8.9c               | 2.4c                |
|----|----------------------|----------|---------------------|----------------------|----------------------|---------------------|---------------------|---------------------|---------------------|--------------------|---------------------|
|    | others               |          |                     |                      |                      |                     |                     |                     |                     |                    |                     |
| 48 | Trimethylamine       | C75503   | 287.0±<br>83.5c     | 261.5±<br>53.1c      | 3787.0±<br>465.6a    | 273.6±<br>11.2c     | 328.5±<br>28.7c     | 1565.3±<br>354.7b   | 194.3±<br>30.1c     | 168.3±<br>52.9c    | 220.5±<br>66.6c     |
| 49 | Triethylamine        | C121448  | 2537.2±<br>68.1de   | 1688.8±<br>216.7e    | 28632.9±<br>848.0a   | 2465.6±<br>104.7de  | 2375.8±<br>206.9e   | 11965.1±<br>1270.4b | 3559.9±<br>108.2d   | 5902.0±<br>432.1c  | 6629.5±<br>312.3c   |
| 50 | 2,5-Dimethylpyrazine | C123320  | 315.9±<br>51.5a     | 267.2±<br>9.5b       | 172.2±<br>32.2c      | 210.5±<br>18.0c     | 190.1±<br>3.9c      | 100.9±<br>5.8d      | 76.1±<br>4.2d       | 64.0±<br>10.3d     | 82.7±<br>27.2d      |
| 51 | Acetic acid-M        | C64197   | 4503.1±<br>380.5b   | 3760.6±<br>289.1cd   | 1208.6±<br>141.1e    | 3224.8±<br>50.3d    | 3299.4±<br>140.3d   | 1317.8±<br>218.4e   | 5540.65±<br>654.0a  | 4302.1±<br>253.1bc | 3713.4±<br>64.0cd   |
| 52 | Acetic acid-D        | C64197   | 363.8±<br>26.3bc    | 330.6±<br>23.7bcd    | 138.9±<br>52.9de     | 270.7±<br>18.9cde   | 268.6±<br>31.3cde   | 111.2±<br>37.4e     | 954.2±<br>267.2a    | 497.5±<br>87.4b    | 411.2±<br>68.6bc    |
| 53 | Ammonia-M            | C7664417 | 9650±<br>1616.3e    | 15787.6±<br>4499.7cd | 117106.3±<br>1012.9b | 14390.9±<br>1531.2d | 18958.3±<br>2299.5c | 123572.5±519.7a     | 7188.7±<br>559.8e   | 7778.0±<br>409.8e  | 7206.8±<br>451.2e   |
| 54 | Ammonia-D            | C7664417 | 49577.7±<br>5811.4d | 64866.6±<br>8900.1c  | 96372.9±<br>6203.7b  | 62551.6±<br>2886.6c | 71062.3±<br>4192.8c | 105930.6±2292.6a    | 26036.2±<br>2028.2e | 28965.2±<br>422.0e | 27696.7±<br>2000.3e |
| 55 | gamma-Terpinene      | C99854   | 71.6±<br>3.2de      | 93.9±<br>11.9c       | 116.8±<br>5.5b       | 83.4±<br>6.3cd      | 61.7±<br>3.5ef      | 139.2±<br>8.0a      | 40.5±<br>2.4f       | 55.5±<br>13.8fg    | 48.7±<br>6.2fg      |
| 56 | 2,5-Dimethylfuran    | C625865  | 25.9±<br>6.1d       | 31.6±<br>3.9d        | 668.5±<br>32.6a      | 28.5±<br>2.0d       | 77.1±<br>7.2c       | 372.5±<br>47.1b     | 25.9±<br>2.2d       | 20.3±<br>6.2d      | 28.4±<br>11.1d      |
| 57 | Thiophene            | C110021  | 652.7±<br>33.3b     | 538.0±<br>21.8d      | 566.4±<br>55.3bcd    | 625.3±<br>14.2bc    | 1126.5±<br>64.7a    | 567.8±<br>79.5bcd   | 539.3±<br>32.8cd    | 503.3±<br>13.8d    | 489.6±<br>7.3d      |
| 58 | Dimethyl sulfide     | C75183   | 7514.3±<br>204.7c   | 8512.6±<br>59.9a     | 5314.3±<br>81.1f     | 8241.9±<br>189.8ab  | 6835.1±<br>138.0d   | 6154.4±<br>108.4e   | 7013.9±<br>50.3d    | 7963.7±<br>113.5b  | 6339.2±<br>222.0e   |
| 59 | 2-Ethylfuran         | C3208160 | 342.9±<br>2.2c      | 289.2±<br>31.8cd     | 538.9±<br>41.2b      | 342.3±<br>49.7c     | 274.7±<br>15.5d     | 682.1±<br>42.8a     | 43.0±<br>2.9e       | 65.4±<br>8.8e      | 89.6±<br>8.1e       |

Data are represented as a mean ± standard deviation of three replicates. Mean values with different lower-case letters in the same row correspond to significant differences at  $p < 0.05$ .
